# Supplementary figures and images for: Testicular Melatonin and Its Pathway in Roe Deer Bucks (Capreolus capreolus) during Pre- and Post-Rut Periods: Correlation with Testicular Involution
Source: MDPI journal article supplement (doi:10.3390/ani11071874), 2021-06-23

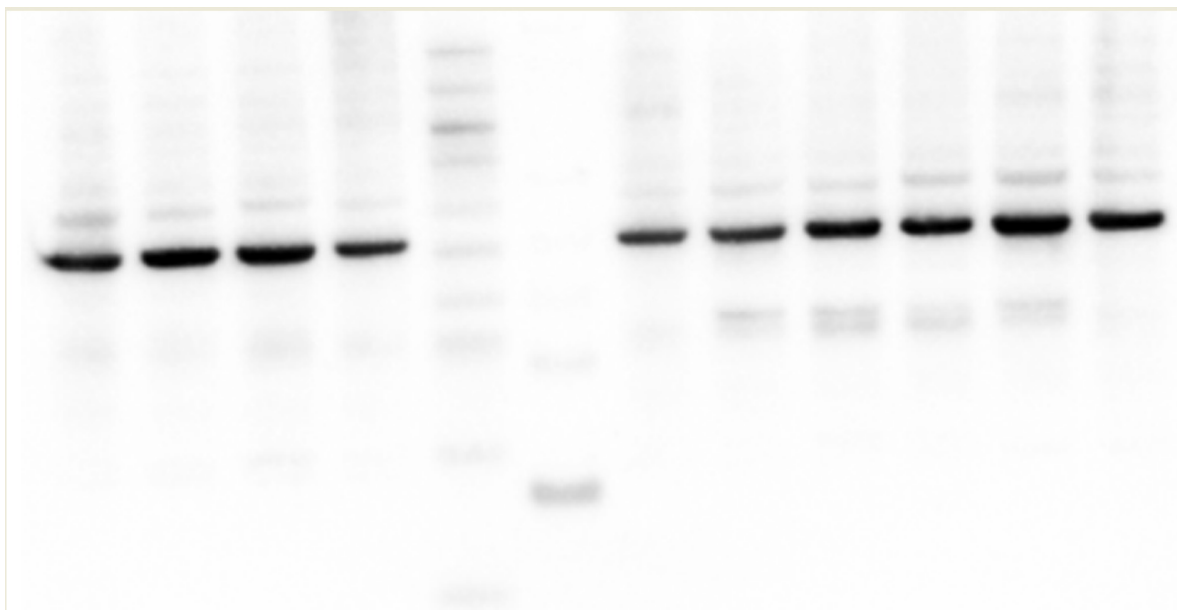

(A) Tub – MT1

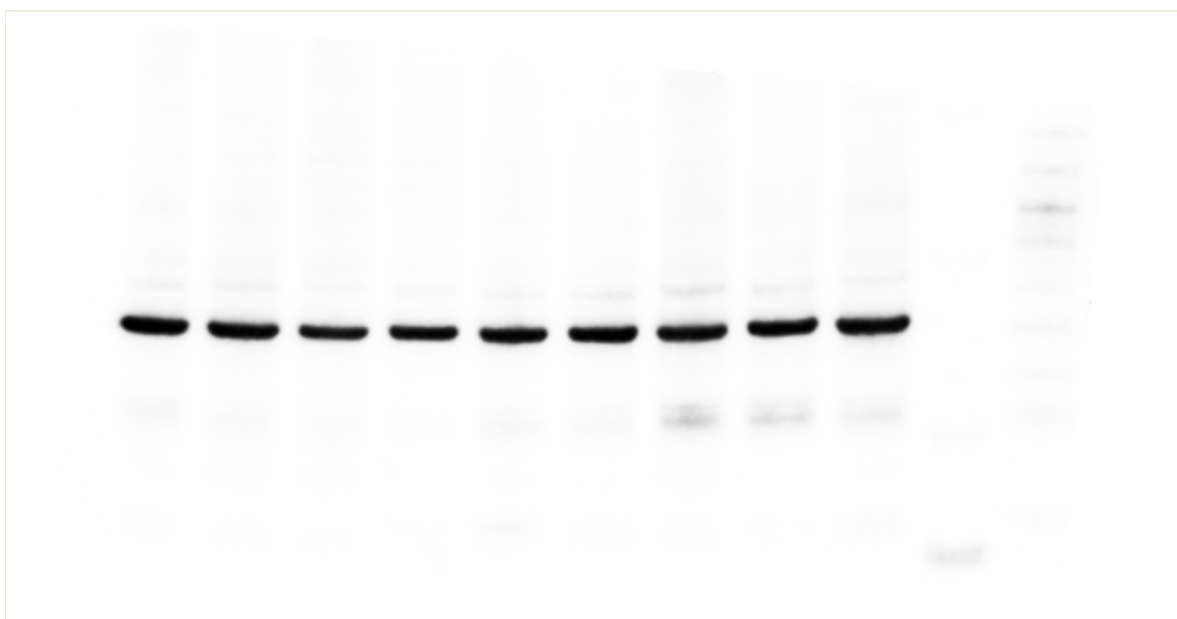

(B) Tub – MT2

**Figure 1.** Original western blot figures. (A) Tub-MT1, (B) Tub-MT2.

Supplement: s1 [file s1]
